# Supplementary material for: Investigation of the stability of magnetite nanoparticles functionalized with catechol based ligands in biological media
Source: Royal Society of Chemistry journal article supplement (doi:10.1039/c2jm34902g), 2012-01-01
Supplement: c2jm34902g.pdf [file c2jm34902g.pdf]

# Investigation of the Stability of Magnetite Nanoparticles Functionalized with Catechol Based Ligands in Biological Media

Steven L. Saville,<sup>a</sup> Roland C. Stone,<sup>a</sup> Bin Qi,<sup>a</sup> and O. Thompson Mefford<sup>a\*</sup>(corresponding author)

<sup>a</sup>Clemson University, School of Materials Science and Engineering, Center for Optical Materials Science and Engineering Technologies, 91 Technology Drive, Anderson, SC 29625 USA

Supplemental information:

The following figures (S1-S5) are FT-IR spectra of DOPA, nitroDOPA, and the polymer modified nanoparticles used within this study.

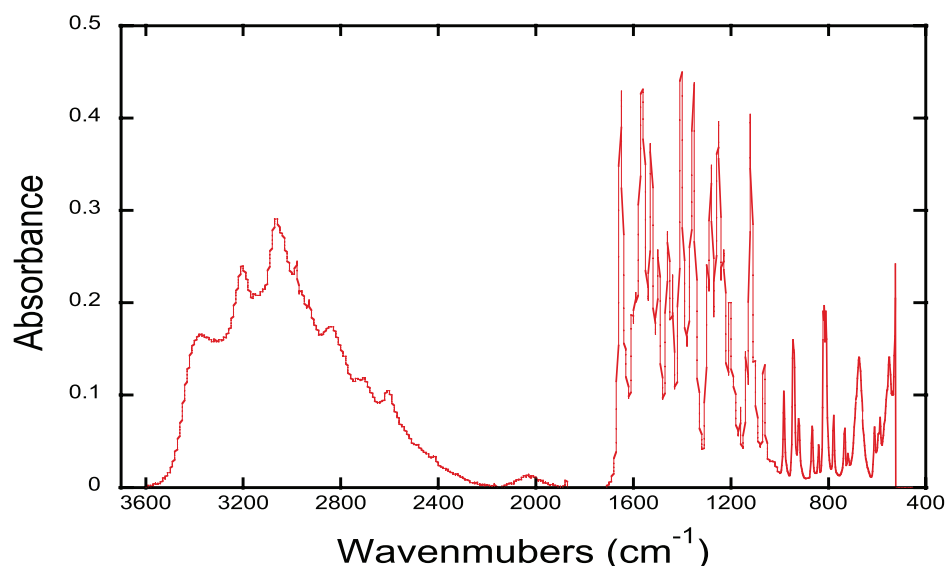

Figure S2: IR spectra of DOPA, which was verified by the presence of an primary amine peak at 3400 cm<sup>-1</sup>, a carboxylic acid peak at 1710 cm<sup>-1</sup>, and several peaks around 1550 cm<sup>-1</sup> corresponding to an aromatic ring.

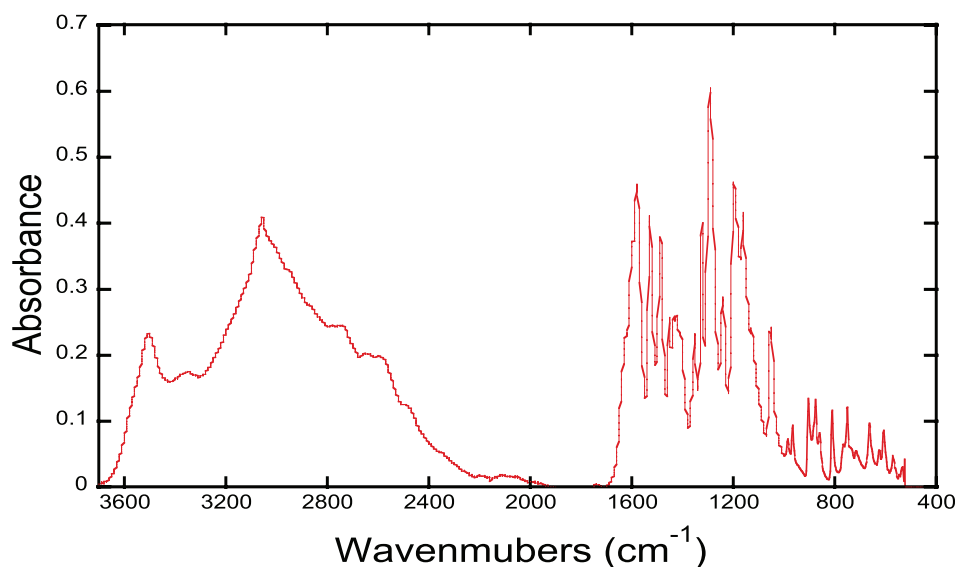

Figure S1: Spectra of nitroDOPA, which was verified by the presence of an amine peak at 3400 cm<sup>-1</sup>, a carboxylic acid peak at 1710 cm<sup>-1</sup>, and several peaks around 1550 cm<sup>-1</sup> corresponding to an aromatic ring. The peaks associated with nitration are overlapped with the peaks of the aromatic carbons (~1500cm<sup>-1</sup>.)

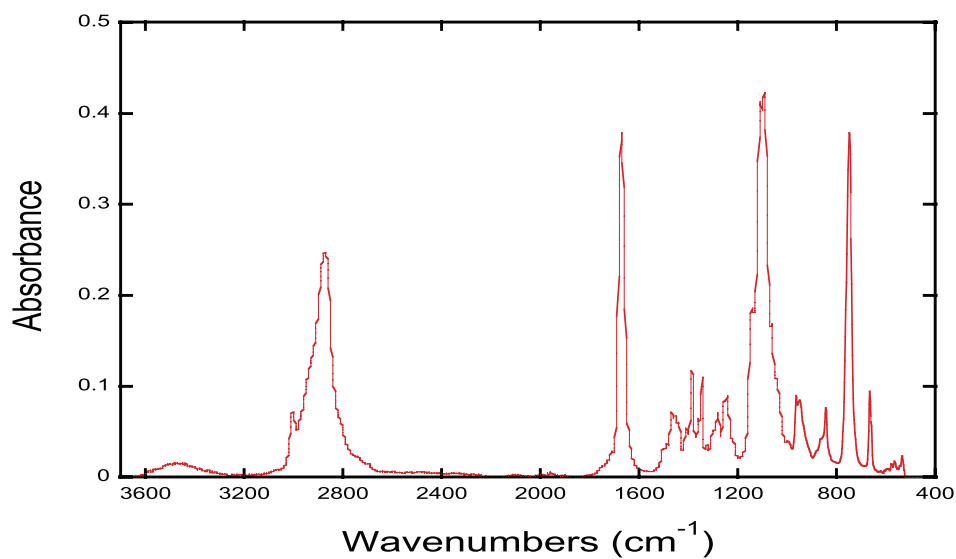

Figure S3: IR spectra of PEG-DOPA coated particles. Polymer modification of nanoparticles was verified by the presence of a peak at 1120 cm<sup>-1</sup>, corresponding to the C-O ether bond in PEO.

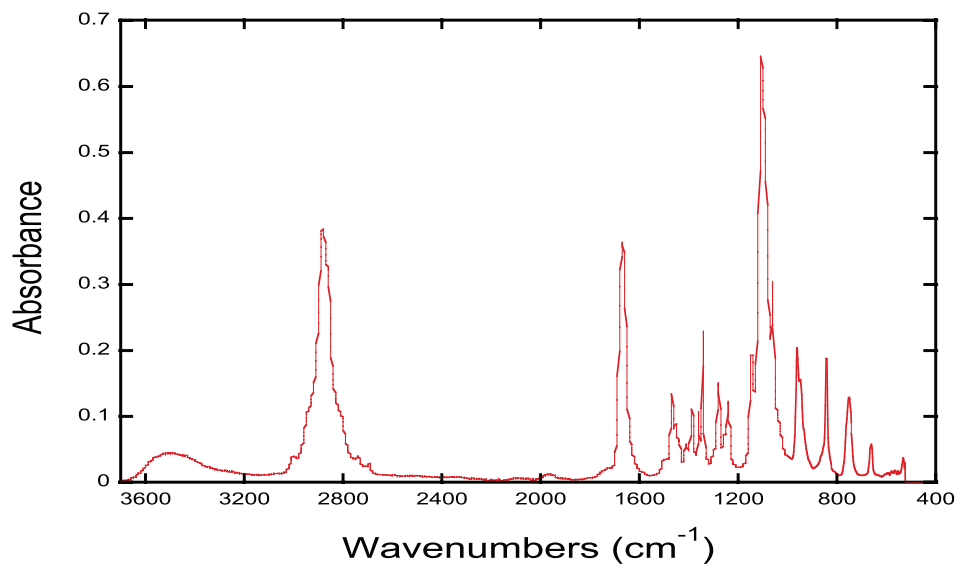

Figure S4: PEG-nitroDOPA coated particles. Polymer modification of nanoparticles was verified by the presence of a peak at 1120 cm<sup>-1</sup>, corresponding to the C-O ether bond in PEO.

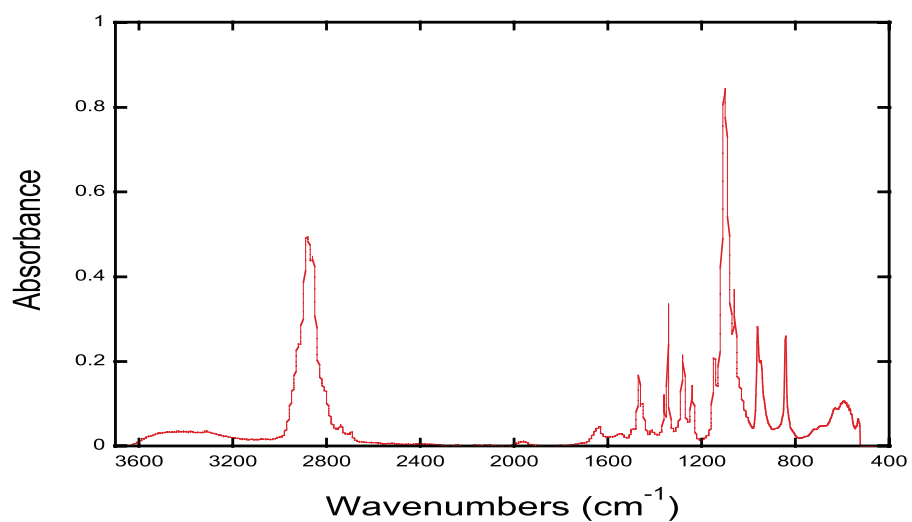

Figure S5: IR spectra of PEG-trinitroDOPA. Polymer modification of nanoparticles was verified by the presence of a peak at 1120 cm<sup>-1</sup>, corresponding to the C-O ether bond in PEO.
